# Supplementary material for: A stakeholder group assessment of interactions between child health and the sustainable development goals in Cambodia
Source: PubMed Central journal article supplement (PMC9203784; doi:10.1038/s43856-022-00135-2), 2022-06-16
Supplement: 43856_2022_135_MOESM3_ESM.pdf [file 43856_2022_135_MOESM3_ESM.pdf]

## Description of Additional Supplementary Files

**File name:** Supplementary Data 1

**Description:** Cross-impact matrix data.

**File name:** Supplementary Data 2

**Description:** All available indicators for sustainable development and budget expenses for Cambodia.
